# Supplementary material for: Facile Organometallic Synthesis of Fe-Based Nanomaterials by Hot Injection Reaction
Source: MDPI journal article supplement (doi:10.3390/nano11051141), 2021-04-28
Supplement: s1 [file s1]

# Supporting Information

## Facile Organometallic Synthesis of Fe-Based Nanomaterials by Hot Injection Reaction

Georgia Basina <sup>1,2</sup>, Hafsa Khurshid <sup>3,4</sup>, Nikolaos Tzitzios <sup>1</sup>, George Hadjipanayis <sup>4</sup>  
and Vasileios Tzitzios <sup>1,\*</sup>

<sup>1</sup> Institute of Nanoscience and Nanotechnology, NCSR Demokritos, 15310 Athens, Greece;  
georgia.basina@ku.ac.ae (G.B.); tz\_nikos@yahoo.gr (N.T.)

<sup>2</sup> Department of Chemical Engineering, Khalifa University, Abu Dhabi P.O. Box 127788, United Arab Emirates

<sup>3</sup> Department of Applied Physics and Astronomy, University of Sharjah, Sharjah 27272, United Arab Emirates;  
hkhurshid@sharjah.ac.ae

<sup>4</sup> Department of Physics and Astronomy, University of Delaware, Newark, DE 19711, USA; hadji@udel.edu

\* Correspondence: v.tzitzios@inn.demokritos.gr; Tel.: +30-210-650-3319

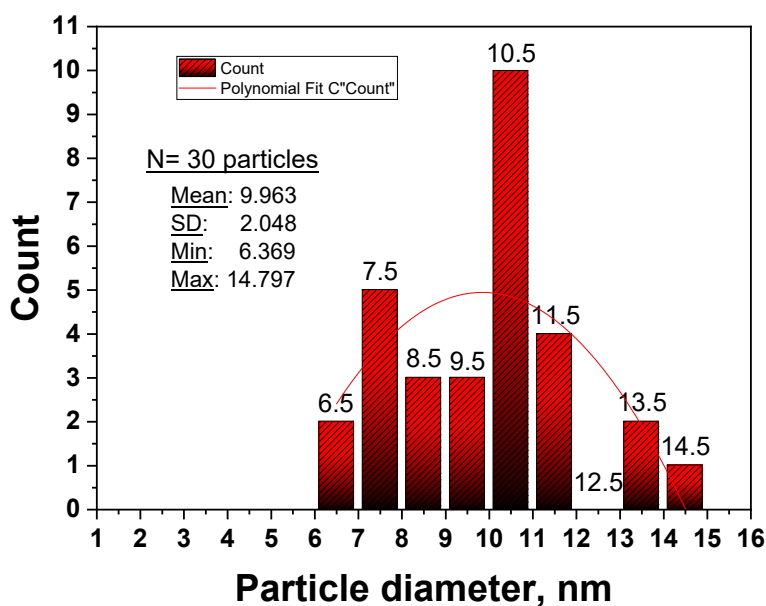

**Figure S1.** Histogram of overall particle (Fe/Fe-oxides) size with core/shell morphology derived from the TEM image in Figure 1a, which corresponds to nanoparticles synthesized by hot injection of Fe(CO)<sub>5</sub> at 315 °C.

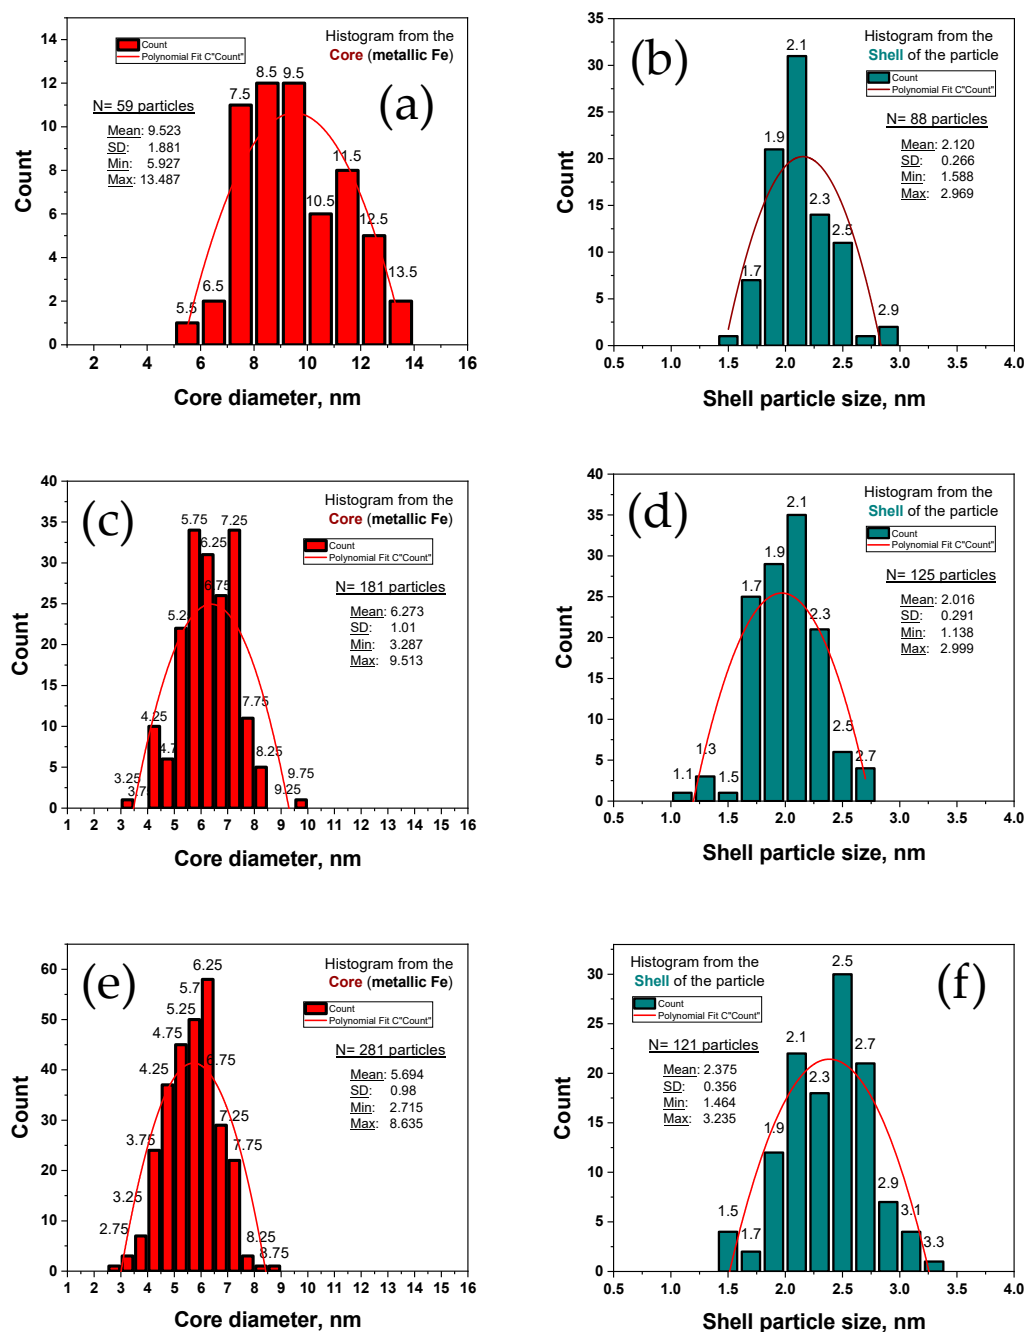

**Figure S2.** Histogram of core size (on the left) and shell (on the right) from Fe/Fe-oxides nanoparticles with a core/shell morphology, derived from: a,b: the TEM images of Figure 1(b,c,d) for the nanoparticles synthesized by hot injection of  $\text{Fe}(\text{CO})_5$  at 285 °C (a, b), from c, d: the TEM image of Figure 1(e) for the nanoparticles synthesized at 260 °C (c, d), and from e, f: the TEM image of Figure 1(f), d for the nanoparticles synthesized by hot injection of  $\text{Fe}(\text{CO})_5$  at 240 °C (e, f).

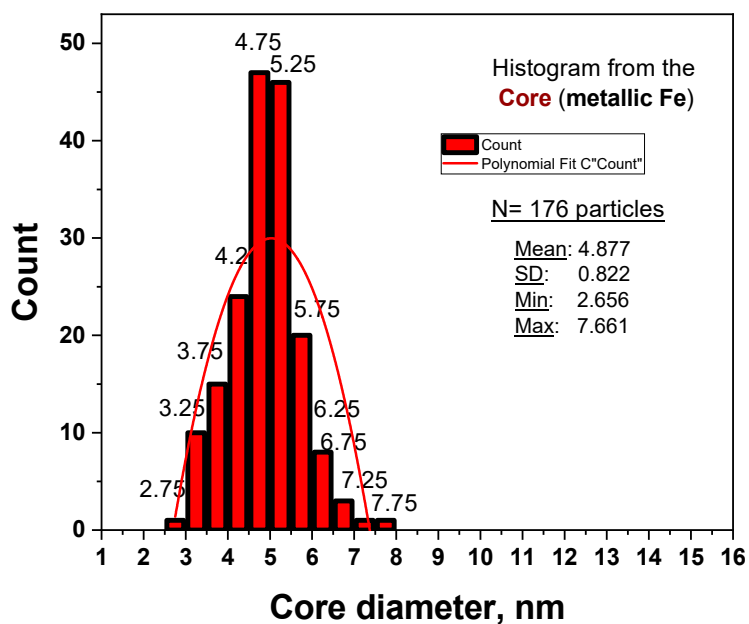

**Figure S3.** Histogram of metallic Fe/core particles in the Fe/Fe-oxides size with core/shell morphology derived from the TEM image in Figure 1g, which corresponds to nanoparticles synthesized by hot injection of  $\text{Fe}(\text{CO})_5$  at 220 °C.

**Table S1.** Summarized data extract from Histograms in Figure S1-S3.

| Sample       | Reaction Temperature            | Particles | Parameters obtained by the histograms <sup>1</sup> |                   |       | Mean size (nm)                  |                    |             |
|--------------|---------------------------------|-----------|----------------------------------------------------|-------------------|-------|---------------------------------|--------------------|-------------|
|              |                                 |           | Minimum Size (nm)                                  | Maximum Size (nm) | SD    | Overall particle (Fe/Fe-oxides) | Core (metallic Fe) | Shell       |
| Figure S1-3. | T <sub>hot injection</sub> (°C) | N         |                                                    |                   |       |                                 |                    |             |
| S1           | 315                             | 30        | 6.369                                              | 14.797            | 2.048 | <b>9.963</b>                    | -                  | -           |
| S2 (a,b)     | 285                             | 59        | 5.927                                              | 13.478            | 1.881 | -                               | <b>9.523</b>       | 2.12±0.266  |
| S2 (c,d)     | 260                             | 181       | 3.287                                              | 9.513             | 1.01  | -                               | <b>6.273</b>       | 2.016±0.291 |
| S2 (e,f)     | 240                             | 281       | 2.715                                              | 8.635             | 0.98  | -                               | <b>5.694</b>       | 2.375±0.356 |
| S3           | 220                             | 176       | 2.656                                              | 7.661             | 0.822 | -                               | <b>4.877</b>       | -           |

<sup>1</sup> Correspond to overall particle size (Fe/Fe-oxides) or to the core (metallic Fe) of the particles.
